# Supplementary material for: Retrospective study to estimate the prevalence and describe the clinicopathological characteristics, treatments received, and outcomes of HER2-low breast cancer
Source: PubMed Central journal article supplement — ESMO Open. 2023 Aug 8;8(4):101615. doi: 10.1016/j.esmoop.2023.101615 (PMC10515285; doi:10.1016/j.esmoop.2023.101615), 2023-08-08

| <b>Table S1. Prevalence by IHC category<sup>a</sup> in patients previously diagnosed with HER2-negative unresectable/metastatic BC</b> |                                         |                           |                   |                  |                                         |                           |                  |                 |
|----------------------------------------------------------------------------------------------------------------------------------------|-----------------------------------------|---------------------------|-------------------|------------------|-----------------------------------------|---------------------------|------------------|-----------------|
|                                                                                                                                        | <b>HR positive, n/N (%)<sup>b</sup></b> |                           |                   |                  | <b>HR negative, n/N (%)<sup>b</sup></b> |                           |                  |                 |
|                                                                                                                                        | IHC 0<br>with no<br>staining            | IHC 0<br>with<br>staining | IHC 1+            | IHC<br>2+/ISH-   | IHC 0<br>with no<br>staining            | IHC 0<br>with<br>staining | IHC 1+           | IHC<br>2+/ISH-  |
| All                                                                                                                                    | 97/554<br>(17.5)                        | 63/554<br>(11.4)          | 298/554<br>(53.8) | 96/554<br>(17.3) | 36/159<br>(22.6)                        | 39/159<br>(24.5)          | 72/159<br>(45.3) | 12/159<br>(7.5) |
| Breast cancer type <sup>c</sup>                                                                                                        |                                         |                           |                   |                  |                                         |                           |                  |                 |
| Primary                                                                                                                                | 28/156<br>(17.9)                        | 17/156<br>(10.9)          | 80/156<br>(51.3)  | 31/156<br>(19.9) | 6/32<br>(18.8)                          | 10/32<br>(31.3)           | 15/32<br>(46.9)  | 1/32<br>(3.1)   |
| Metastatic                                                                                                                             | 69/395<br>(17.5)                        | 46/395<br>(11.6)          | 216/395<br>(54.7) | 64/395<br>(16.2) | 30/127<br>(23.6)                        | 29/127<br>(22.8)          | 57/127<br>(44.9) | 11/127<br>(8.7) |
| Assay <sup>d</sup>                                                                                                                     |                                         |                           |                   |                  |                                         |                           |                  |                 |
| Ventana 4B5                                                                                                                            | 71/386<br>(18.4)                        | 37/386<br>(9.6)           | 206/386<br>(53.4) | 72/386<br>(18.7) | 20/97<br>(20.6)                         | 26/97<br>(26.8)           | 45/97<br>(46.4)  | 6/97<br>(6.2)   |
| Non-Ventana<br>4B5 <sup>e</sup>                                                                                                        | 25/152<br>(16.4)                        | 24/152<br>(15.8)          | 82/152<br>(53.9)  | 21/152<br>(13.8) | 15/58<br>(25.9)                         | 12/58<br>(20.7)           | 25/58<br>(43.1)  | 6/58<br>(10.3)  |
| Country                                                                                                                                |                                         |                           |                   |                  |                                         |                           |                  |                 |
| Australia                                                                                                                              | 2/22<br>(9.1)                           | 6/22<br>(27.3)            | 12/22<br>(54.5)   | 2/22<br>(9.1)    | 2/5<br>(40.0)                           | 1/5<br>(20.0)             | 2/5<br>(40.0)    | 0/5<br>(0)      |
| Canada                                                                                                                                 | 10/55<br>(18.2)                         | 7/55<br>(12.7)            | 27/55<br>(49.1)   | 11/55<br>(20.0)  | 7/24<br>(29.2)                          | 4/24<br>(16.7)            | 10/24<br>(41.7)  | 3/24<br>(12.5)  |
| Germany                                                                                                                                | 7/85<br>(8.2)                           | 8/85<br>(9.4)             | 56/85<br>(65.9)   | 14/85<br>(16.5)  | 3/26<br>(11.5)                          | 3/26<br>(11.5)            | 17/26<br>(65.4)  | 3/26<br>(11.5)  |
| France                                                                                                                                 | 17/70<br>(24.3)                         | 0/70<br>(0)               | 43/70<br>(61.4)   | 10/70<br>(14.3)  | 1/2<br>(50.0)                           | 0/2<br>(0)                | 1/2<br>(50.0)    | 0/2<br>(0)      |
| Italy                                                                                                                                  | 14/88<br>(15.9)                         | 15/88<br>(17.0)           | 52/88<br>(59.1)   | 7/88<br>(8.0)    | 10/36<br>(27.8)                         | 7/36<br>(19.4)            | 16/36<br>(44.4)  | 3/36<br>(8.3)   |
| Japan                                                                                                                                  | 17/120<br>(14.2)                        | 21/120<br>(17.5)          | 55/120<br>(45.8)  | 27/120<br>(22.5) | 6/35<br>(17.1)                          | 16/35<br>(45.7)           | 12/35<br>(34.3)  | 1/35<br>(2.9)   |
| South Korea                                                                                                                            | 3/16<br>(18.8)                          | 1/16<br>(6.3)             | 8/16<br>(50.0)    | 4/16<br>(25.0)   | 4/9<br>(44.4)                           | 1/9<br>(11.1)             | 3/9<br>(33.3)    | 1/9<br>(11.1)   |
| Portugal                                                                                                                               | 21/48<br>(43.8)                         | 0/48<br>(0)               | 20/48<br>(41.7)   | 7/48<br>(14.6)   | 1/2<br>(50.0)                           | 0/2<br>(0)                | 1/2<br>(50.0)    | 0/2<br>(0)      |
| United Kingdom                                                                                                                         | 3/20<br>(15.0)                          | 3/20<br>(15.0)            | 9/20<br>(45.0)    | 5/20<br>(25.0)   | 2/9<br>(22.2)                           | 2/9<br>(22.2)             | 5/9<br>(55.6)    | 0/9<br>(0)      |
| United States                                                                                                                          | 3/30<br>(10.0)                          | 2/30<br>(6.7)             | 16/30<br>(53.3)   | 9/30<br>(30.0)   | 0/11<br>(0)                             | 5/11<br>(45.5)            | 5/11<br>(45.5)   | 1/11<br>(9.1)   |

BC, breast cancer; HER2, human epidermal growth factor receptor 2; HR, hormone receptor; IHC, immunohistochemistry; ISH, in situ hybridization. Percentages are calculated based on reported/non-missing data.

<sup>a</sup> IHC statuses were based on rescore results.

<sup>b</sup> Denominator is the number of patients with available HR status and HER2 category of respective assay, cancer type, or country.

<sup>c</sup> This subcategory only includes patients with a sample with an available biopsy date. Primary BC was defined as a rescored biopsy sample dated 30 days before the unresectable/metastatic BC diagnosis date. Metastatic was defined as a rescored biopsy sample dated on or after 30 days, prior to the unresectable/metastatic BC diagnosis date.

<sup>d</sup> Includes only known (non-missing) IHC tests.

<sup>e</sup> Non-Ventana 4B5 assays include HercepTest (Agilent), Bond Oracle HER2 IHC System (Leica), and unknown assays.

| <b>Table S2. Patient demographics by IHC category<sup>a</sup></b>                                                                                     |                                        |                                     |                   |                           |                                        |                                     |                  |                           |
|-------------------------------------------------------------------------------------------------------------------------------------------------------|----------------------------------------|-------------------------------------|-------------------|---------------------------|----------------------------------------|-------------------------------------|------------------|---------------------------|
|                                                                                                                                                       | <b>HR-positive</b>                     |                                     |                   |                           | <b>HR-negative</b>                     |                                     |                  |                           |
|                                                                                                                                                       | IHC 0<br>with no<br>staining<br>(n=97) | IHC 0<br>with<br>staining<br>(n=63) | IHC 1+<br>(n=298) | IHC 2+/<br>ISH-<br>(n=96) | IHC 0<br>with no<br>staining<br>(n=36) | IHC 0<br>with<br>staining<br>(n=39) | IHC 1+<br>(n=72) | IHC 2+/<br>ISH-<br>(n=12) |
| Female, n (%)                                                                                                                                         | 96 (99.0)                              | 63<br>(100.0)                       | 298<br>(100.0)    | 96<br>(100.0)             | 36<br>(100.0)                          | 39<br>(100.0)                       | 72<br>(100.0)    | 11 (91.7)                 |
| Age at index date,<br>median (range),<br>years <sup>b</sup>                                                                                           | 60 (28-<br>90)                         | 56 (29-<br>77)                      | 61 (31-<br>93)    | 60 (32-<br>97)            | 53 (35-<br>78)                         | 52 (35-<br>92)                      | 56 (31-<br>80)   | 63 (38-<br>78)            |
| Age range, n (%)                                                                                                                                      |                                        |                                     |                   |                           |                                        |                                     |                  |                           |
| 18-44 years                                                                                                                                           | 12 (12.4)                              | 7 (11.1)                            | 20 (6.7)          | 14 (14.6)                 | 8 (22.2)                               | 11 (28.2)                           | 8 (11.1)         | 1 (8.3)                   |
| 45-64 years                                                                                                                                           | 40 (41.2)                              | 28 (44.4)                           | 116<br>(38.9)     | 39 (40.6)                 | 17 (47.2)                              | 13 (33.3)                           | 34 (47.2)        | 4 (33.3)                  |
| ≥65 years                                                                                                                                             | 34 (35.1)                              | 14 (22.2)                           | 90 (30.2)         | 26 (27.1)                 | 5 (13.9)                               | 10 (25.6)                           | 11 (15.3)        | 4 (33.3)                  |
| Age not<br>reported/missing                                                                                                                           | 11 (11.3)                              | 14 (22.2)                           | 72 (24.2)         | 17 (17.7)                 | 6 (16.7)                               | 5 (12.8)                            | 19 (26.4)        | 3 (25.0)                  |
| Race, n (%)                                                                                                                                           |                                        |                                     |                   |                           |                                        |                                     |                  |                           |
| American Indian or<br>Alaska Native                                                                                                                   | 0                                      | 0                                   | 1 (0.3)           | 0                         | 0                                      | 0                                   | 0                | 0                         |
| Asian                                                                                                                                                 | 20 (20.6)                              | 22 (34.9)                           | 64 (21.5)         | 33 (34.4)                 | 10 (27.8)                              | 18 (46.2)                           | 15 (20.8)        | 2 (16.7)                  |
| Black or African<br>American                                                                                                                          | 2 (2.1)                                | 1 (1.6)                             | 3 (1.0)           | 2 (2.1)                   | 0                                      | 2 (5.1)                             | 0                | 1 (8.3)                   |
| White                                                                                                                                                 | 31 (32.0)                              | 28 (44.4)                           | 124<br>(41.6)     | 34 (35.4)                 | 18 (50.0)                              | 17 (43.6)                           | 41 (56.9)        | 8 (66.7)                  |
| Other                                                                                                                                                 | 0                                      | 0                                   | 4 (1.3)           | 0                         | 0                                      | 0                                   | 0                | 0                         |
| Not<br>reported/missing                                                                                                                               | 44 (45.4)                              | 12 (19.0)                           | 102<br>(34.2)     | 27 (28.1)                 | 8 (22.2)                               | 2 (5.1)                             | 16 (22.2)        | 1 (8.3)                   |
| Menopausal status, n (%) <sup>c</sup>                                                                                                                 |                                        |                                     |                   |                           |                                        |                                     |                  |                           |
| Premenopausal                                                                                                                                         | 27 (27.8)                              | 17 (27.0)                           | 67 (22.5)         | 22 (22.9)                 | 15 (41.7)                              | 17 (43.6)                           | 23 (31.9)        | 2 (16.7)                  |
| Postmenopausal                                                                                                                                        | 59 (60.8)                              | 40 (63.5)                           | 197<br>(66.1)     | 62 (64.6)                 | 15 (41.7)                              | 20 (51.3)                           | 38 (52.8)        | 7 (58.3)                  |
| Not<br>reported/missing                                                                                                                               | 11 (11.3)                              | 6 (9.5)                             | 34 (11.4)         | 12 (12.5)                 | 6 (16.7)                               | 2 (5.1)                             | 11 (15.3)        | 3 (25.0)                  |
| HR, hormone receptor; IHC, immunohistochemistry; ISH, in situ hybridization.                                                                          |                                        |                                     |                   |                           |                                        |                                     |                  |                           |
| <sup>a</sup> IHC statuses were based on rescore results.                                                                                              |                                        |                                     |                   |                           |                                        |                                     |                  |                           |
| <sup>b</sup> Index date was defined as the date of human epidermal growth factor receptor 2–negative unresectable/metastatic breast cancer diagnosis. |                                        |                                     |                   |                           |                                        |                                     |                  |                           |
| <sup>c</sup> Status can be from records after the baseline period.                                                                                    |                                        |                                     |                   |                           |                                        |                                     |                  |                           |

| <b>Table S3. Patient clinical characteristics by IHC category<sup>a</sup></b> |                                        |                                     |                   |                           |                                        |                                     |                  |                           |
|-------------------------------------------------------------------------------|----------------------------------------|-------------------------------------|-------------------|---------------------------|----------------------------------------|-------------------------------------|------------------|---------------------------|
|                                                                               | <b>HR-positive, n (%)</b>              |                                     |                   |                           | <b>HR-negative, n (%)</b>              |                                     |                  |                           |
|                                                                               | IHC 0<br>with no<br>staining<br>(n=97) | IHC 0<br>with<br>staining<br>(n=63) | IHC 1+<br>(n=298) | IHC 2+/<br>ISH-<br>(n=96) | IHC 0<br>with no<br>staining<br>(n=36) | IHC 0<br>with<br>staining<br>(n=39) | IHC 1+<br>(n=72) | IHC 2+/<br>ISH-<br>(n=12) |
| <b>Time from initial BC diagnosis to metastatic BC diagnosis<sup>b</sup></b>  |                                        |                                     |                   |                           |                                        |                                     |                  |                           |
| <2 years                                                                      | 44 (45.4)                              | 19 (30.2)                           | 113<br>(37.9)     | 40 (41.7)                 | 16 (44.4)                              | 22 (56.4)                           | 24 (33.3)        | 4 (33.3)                  |
| 2-5 years                                                                     | 14 (14.4)                              | 12 (19.0)                           | 34 (11.4)         | 19 (19.8)                 | 6 (16.7)                               | 6 (15.4)                            | 17 (23.6)        | 2 (16.7)                  |
| >5 years                                                                      | 28 (28.9)                              | 17 (27.0)                           | 78 (26.2)         | 20 (20.8)                 | 8 (22.2)                               | 6 (15.4)                            | 12 (16.7)        | 3 (25.0)                  |
| Not reported/missing                                                          | 11 (11.3)                              | 15 (23.8)                           | 73 (24.5)         | 17 (17.7)                 | 6 (16.7)                               | 5 (12.8)                            | 19 (26.4)        | 3 (25.0)                  |
| <b>Metastatic location<sup>c</sup></b>                                        |                                        |                                     |                   |                           |                                        |                                     |                  |                           |
| Bone only                                                                     | 17 (17.5)                              | 14 (22.2)                           | 69 (23.2)         | 21 (21.9)                 | 2 (5.6)                                | 2 (5.1)                             | 4 (5.6)          | 1 (8.3)                   |
| Brain                                                                         | 4 (4.1)                                | 4 (6.3)                             | 10 (3.4)          | 4 (4.2)                   | 2 (5.6)                                | 2 (5.1)                             | 7 (9.7)          | 2 (16.7)                  |
| Liver                                                                         | 33 (34.0)                              | 18 (28.6)                           | 88 (29.5)         | 23 (24.0)                 | 12<br>(33.3)                           | 5<br>(12.8)                         | 26<br>(36.1)     | 6<br>(50.0)               |
| Lung                                                                          | 22 (22.7)                              | 12 (19.0)                           | 70 (23.5)         | 24 (25.0)                 | 11 (30.6)                              | 13 (33.3)                           | 21 (29.2)        | 3 (25.0)                  |
| Visceral                                                                      | 63<br>(64.9)                           | 38<br>(60.3)                        | 165<br>(55.4)     | 49<br>(51.0)              | 20<br>(55.6)                           | 19<br>(48.7)                        | 45<br>(62.5)     | 8 (66.7)                  |
| <b>Number of metastatic locations<sup>c</sup></b>                             |                                        |                                     |                   |                           |                                        |                                     |                  |                           |
| 1                                                                             | 43<br>(44.3)                           | 35<br>(55.6)                        | 178<br>(59.7)     | 44<br>(45.8)              | 20<br>(55.6)                           | 16<br>(41.0)                        | 35<br>(48.6)     | 6<br>(50.0)               |
| 2                                                                             | 29 (29.9)                              | 11 (17.5)                           | 65 (21.8)         | 29 (30.2)                 | 6 (16.7)                               | 15 (38.5)                           | 16 (22.2)        | 1 (8.3)                   |
| ≥3                                                                            | 25 (25.8)                              | 17 (27.0)                           | 53 (17.8)         | 22 (22.9)                 | 10 (27.8)                              | 6 (15.4)                            | 19 (26.4)        | 5 (41.7)                  |
| <b>Metastatic or locally advanced at index date<sup>b</sup></b>               |                                        |                                     |                   |                           |                                        |                                     |                  |                           |
| Locally advanced                                                              | 2 (2.1)                                | 0                                   | 5 (1.7)           | 2 (2.1)                   | 1 (2.8)                                | 1 (2.6)                             | 0                | 0                         |
| Metastatic                                                                    | 80<br>(82.5)                           | 49<br>(77.8)                        | 221<br>(74.2)     | 72<br>(75.0)              | 29<br>(80.6)                           | 33<br>(84.6)                        | 51<br>(70.8)     | 9<br>(75.0)               |
| Both                                                                          | 6 (6.2)                                | 0                                   | 4 (1.3)           | 6 (6.3)                   | 1 (2.8)                                | 1 (2.6)                             | 2 (2.8)          | 0                         |
| Not reported/missing                                                          | 9 (9.3)                                | 14 (22.2)                           | 68 (22.8)         | 16 (16.7)                 | 5 (13.9)                               | 4 (10.3)                            | 19 (26.4)        | 3 (25.0)                  |
| <b>Stage at initial BC diagnosis</b>                                          |                                        |                                     |                   |                           |                                        |                                     |                  |                           |
| I                                                                             | 4 (4.1)                                | 4 (6.3)                             | 13 (4.4)          | 5 (5.2)                   | 5 (13.9)                               | 4 (10.3)                            | 7 (9.7)          | 1 (8.3)                   |
| II                                                                            | 16 (16.5)                              | 20 (31.7)                           | 61 (20.5)         | 19 (19.8)                 | 6 (16.7)                               | 15 (38.5)                           | 14 (19.4)        | 2 (16.7)                  |
| III                                                                           | 16 (16.5)                              | 9 (14.3)                            | 36 (12.1)         | 11 (11.5)                 | 7 (19.4)                               | 11 (28.2)                           | 15 (20.8)        | 3 (25.0)                  |
| IV                                                                            | 20 (20.6)                              | 8 (12.7)                            | 32 (10.7)         | 21 (21.9)                 | 4 (11.1)                               | 5 (12.8)                            | 1 (1.4)          | 1 (8.3)                   |
| Other/not reported/missing                                                    | 41<br>(42.3)                           | 22<br>(34.9)                        | 156<br>(52.3)     | 40<br>(41.7)              | 14<br>(38.9)                           | 4<br>(10.3)                         | 35<br>(48.6)     | 5<br>(41.7)               |
| HR, hormone receptor; IHC, immunohistochemistry; ISH, in situ hybridization.  |                                        |                                     |                   |                           |                                        |                                     |                  |                           |

<sup>a</sup> IHC statuses were based on rescore results.

<sup>b</sup> Index date was defined as the date of human epidermal growth factor receptor 2–negative unresectable/metastatic breast cancer diagnosis.

<sup>c</sup> Reported over the course of disease.

**Table S4. Treatments received in the metastatic setting by IHC category**

|                                       | HR-positive, n (%)                                  |                                                  |                                |                                       | HR-negative, n (%)                                  |                                                  |                               |                                       |
|---------------------------------------|-----------------------------------------------------|--------------------------------------------------|--------------------------------|---------------------------------------|-----------------------------------------------------|--------------------------------------------------|-------------------------------|---------------------------------------|
|                                       | IHC 0<br>with no<br>staining <sup>a</sup><br>(n=75) | IHC 0<br>with<br>staining <sup>a</sup><br>(n=55) | IHC 1+ <sup>a</sup><br>(n=238) | IHC<br>2+/ISH- <sup>a</sup><br>(n=80) | IHC 0<br>with no<br>staining <sup>a</sup><br>(n=22) | IHC 0<br>with<br>staining <sup>a</sup><br>(n=33) | IHC 1+ <sup>a</sup><br>(n=60) | IHC<br>2+/ISH- <sup>a</sup><br>(n=11) |
| <b>Overall</b>                        |                                                     |                                                  |                                |                                       |                                                     |                                                  |                               |                                       |
| Endocrine therapy                     | 69/75<br>(92.0)                                     | 47/55<br>(85.5)                                  | 215/238<br>(90.3)              | 72/80<br>(90.0)                       | 3/22<br>(13.6)                                      | 3/33<br>(9.1)                                    | 13/60<br>(21.7)               | 4/11<br>(36.4)                        |
| Chemotherapy                          | 56/75<br>(74.7)                                     | 42/55<br>(76.4)                                  | 180/238<br>(75.6)              | 59/80<br>(73.8)                       | 22/22<br>(100.0)                                    | 33/33<br>(100.0)                                 | 60/60<br>(100.0)              | 11/11<br>(100.0)                      |
| CDK4/6i                               | 35/75<br>(46.7)                                     | 13/55<br>(23.6)                                  | 84/238<br>(35.3)               | 33/80<br>(41.3)                       | 0/22<br>(0)                                         | 1/33<br>(3.0)                                    | 2/60<br>(3.3)                 | 1/11<br>(9.1)                         |
| Other targeted therapies <sup>b</sup> | 17/75<br>(22.7)                                     | 12/55<br>(21.8)                                  | 68/238<br>(28.6)               | 21/80<br>(26.3)                       | 3/22<br>(13.6)                                      | 8/33<br>(24.2)                                   | 11/60<br>(18.3)               | 1/11<br>(9.1)                         |
| <b>First treatment</b>                |                                                     |                                                  |                                |                                       |                                                     |                                                  |                               |                                       |
| Endocrine monotherapy                 | 35/75<br>(46.7)                                     | 27/55<br>(49.1)                                  | 98/238<br>(41.2)               | 39/80<br>(48.8)                       | 1/22<br>(4.5)                                       | 0/33<br>(0)                                      | 2/60<br>(3.3)                 | 0/11<br>(0)                           |
| Single-agent<br>chemotherapy          | 12/75<br>(16.0)                                     | 11/55<br>(20.0)                                  | 49/238<br>(20.6)               | 13/80<br>(16.3)                       | 8/22<br>(36.4)                                      | 15/33<br>(45.5)                                  | 31/60<br>(51.7)               | 5/11<br>(45.5)                        |
| CDK4/6i                               | 0/75<br>(0)                                         | 0/55<br>(0)                                      | 0/238<br>(0)                   | 1/80<br>(1.3)                         | 0/22<br>(0)                                         | 0/33<br>(0)                                      | 0/60<br>(0)                   | 0/11<br>(0)                           |
| Other targeted therapies <sup>b</sup> | 0/75<br>(0)                                         | 0/55<br>(0)                                      | 0/238<br>(0)                   | 0/80<br>(0)                           | 0/22<br>(0)                                         | 0/33<br>(0)                                      | 0/60<br>(0)                   | 0/11<br>(0)                           |
| Immunotherapy                         | 0/75<br>(0)                                         | 0/55<br>(0)                                      | 0/238<br>(0)                   | 0/80<br>(0)                           | 0/22<br>(0)                                         | 1/33<br>(3.0)                                    | 2/60<br>(3.3)                 | 0/11<br>(0)                           |
| Combination therapy<br>(any)          | 28/75<br>(37.3)                                     | 17/55<br>(30.9)                                  | 91/238<br>(38.2)               | 27/80<br>(33.8)                       | 13/22<br>(59.1)                                     | 17/33<br>(51.5)                                  | 25/60<br>(41.7)               | 6/11<br>(54.5)                        |

CDK4/6i, cyclin-dependent kinase 4 and 6 inhibitors; HER2, human epidermal growth factor receptor 2; HR, hormone receptor; IHC, immunohistochemistry; ISH, in situ hybridization. Percentages were calculated based on reported/nonmissing data.

<sup>a</sup> IHC statuses are based on rescore results.

<sup>b</sup> Includes anti-HER2 agents, antiangiogenesis agents, poly (ADP-ribose) polymerase, phosphoinositide 3-kinase, and mechanistic target of rapamycin inhibitors.

**Table S5. Clinical outcomes by IHC category<sup>a</sup>**

|                                          | HR positive, Kaplan-Meier estimate, median<br>(95% CI), months |                                  |                     |                          | HR negative, Kaplan-Meier estimate, median<br>(95% CI), months |                                  |                     |                          |
|------------------------------------------|----------------------------------------------------------------|----------------------------------|---------------------|--------------------------|----------------------------------------------------------------|----------------------------------|---------------------|--------------------------|
|                                          | IHC 0 with<br>no staining<br>(n=75)                            | IHC 0 with<br>staining<br>(n=55) | IHC 1+<br>(n=238)   | IHC<br>2+/ISH-<br>(n=80) | IHC 0 with<br>no staining<br>(n=22)                            | IHC 0 with<br>staining<br>(n=33) | IHC 1+<br>(n=60)    | IHC<br>2+/ISH-<br>(n=11) |
| Time to<br>treatment failure             | 7.4<br>(5.1-10.0)                                              | 5.7<br>(3.3-7.1)                 | 7.6<br>(5.8-9.8)    | 5.7<br>(4.3- 8.5)        | 4.8<br>(3.5- 10.7)                                             | 2.3<br>(1.7-3.5)                 | 3.6<br>(2.7-4.4)    | 4.4<br>(0.0-11.0)        |
| Time to first<br>subsequent<br>treatment | 9.8<br>(7.1-14.5)                                              | 6.3<br>(4.0-8.2)                 | 9.3<br>(8.0-12.8)   | 10.4<br>(6.3-15.3)       | 8.6<br>(4.4-11.8)                                              | 4.0<br>(2.8-5.4)                 | 5.3<br>(3.4-7.6)    | 5.6<br>(0.3-11.2)        |
| Overall survival                         | 45.1<br>(35.6-54.2)                                            | 35.5<br>(26.0-53.7)              | 47.0<br>(40.7-53.2) | 42.2<br>(31.1-48.3)      | 16.8<br>(10.7-30.8)                                            | 10.4<br>(7.7-27.5)               | 21.3<br>(14.1-29.4) | 20.9<br>(3.5-NC)         |

HR, hormone receptor; IHC, immunohistochemistry; ISH, in situ hybridization, NC, not calculable.

<sup>a</sup> IHC statuses were based on rescore results.



| <b>Table S6. Concordance between historical and rescored HER2 slides</b>                                                                                                                                                                 |                                                                             |                                                                              |                                                                                   |                                                                                         |                       |
|------------------------------------------------------------------------------------------------------------------------------------------------------------------------------------------------------------------------------------------|-----------------------------------------------------------------------------|------------------------------------------------------------------------------|-----------------------------------------------------------------------------------|-----------------------------------------------------------------------------------------|-----------------------|
|                                                                                                                                                                                                                                          | <b>Agreement on IHC 0 (positive percent agreement<sup>a</sup>), n/N (%)</b> | <b>Agreement on IHC 1+ (positive percent agreement<sup>a</sup>), n/N (%)</b> | <b>Agreement on IHC 2+/ISH- (positive percent agreement<sup>a</sup>), n/N (%)</b> | <b>Agreement on all IHC categories (overall percent agreement<sup>b</sup>), n/N (%)</b> | <b>Kappa (95% CI)</b> |
| All                                                                                                                                                                                                                                      | 193/276 (69.9)                                                              | 232/303 (76.6)                                                               | 100/207 (48.3) <sup>c</sup>                                                       | 525/786 (66.8)                                                                          | 0.484 (0.434-0.535)   |
| <b>Assay<sup>d</sup></b>                                                                                                                                                                                                                 |                                                                             |                                                                              |                                                                                   |                                                                                         |                       |
| Ventana 4B5                                                                                                                                                                                                                              | 146/215 (67.9)                                                              | 171/216 (79.2)                                                               | 72/136 (52.9)                                                                     | 389/567 (68.6)                                                                          | 0.511 (0.452-0.570)   |
| Non-Ventana 4B5 <sup>e</sup>                                                                                                                                                                                                             | 47/60 (78.3)                                                                | 55/80 (68.8)                                                                 | 27/70 (38.6)                                                                      | 129/210 (61.4)                                                                          | 0.415 (0.318-0.512)   |
| <b>Country</b>                                                                                                                                                                                                                           |                                                                             |                                                                              |                                                                                   |                                                                                         |                       |
| Australia                                                                                                                                                                                                                                | 8/14 (57.1)                                                                 | 9/12 (75.0)                                                                  | 1/2 (50.0)                                                                        | 18/28 (64.3)                                                                            | 0.386 (0.091-0.681)   |
| Canada                                                                                                                                                                                                                                   | 15/16 (93.8)                                                                | 6/15 (40.0)                                                                  | 14/48 (29.2)                                                                      | 35/79 (44.3)                                                                            | 0.239 (0.113-0.365)   |
| Germany                                                                                                                                                                                                                                  | 35/72 (48.6)                                                                | 61/75 (81.3)                                                                 | 16/33 (48.5)                                                                      | 112/180 (62.2)                                                                          | 0.390 (0.280-0.500)   |
| France                                                                                                                                                                                                                                   | 13/16 (81.3)                                                                | 16/19 (84.2)                                                                 | 11/37 (29.7)                                                                      | 40/72 (55.6)                                                                            | 0.372 (0.229-0.515)   |
| Italy                                                                                                                                                                                                                                    | 31/43 (72.1)                                                                | 50/65 (76.9)                                                                 | 10/16 (62.5)                                                                      | 91/124 (73.4)                                                                           | 0.536 (0.397-0.675)   |
| Japan                                                                                                                                                                                                                                    | 48/63 (76.2)                                                                | 36/53 (67.9)                                                                 | 22/39 (56.4)                                                                      | 106/155 (68.4)                                                                          | 0.513 (0.401-0.625)   |
| South Korea                                                                                                                                                                                                                              | 6/6 (100.0)                                                                 | 6/10 (60.0)                                                                  | 4/9 (44.4)                                                                        | 16/25 (64.0)                                                                            | 0.459 (0.179-0.739)   |
| Portugal                                                                                                                                                                                                                                 | 21/23 (91.3)                                                                | 19/20 (95.0)                                                                 | 7/8 (87.5)                                                                        | 47/51 (92.2)                                                                            | 0.872 (0.752-0.993)   |
| United Kingdom                                                                                                                                                                                                                           | 8/13 (61.5)                                                                 | 10/13 (76.9)                                                                 | 5/5 (100.0)                                                                       | 23/31 (74.2)                                                                            | 0.585 (0.324-0.846)   |
| United States                                                                                                                                                                                                                            | 8/10 (80.0)                                                                 | 19/21 (90.5)                                                                 | 10/10 (100.0)                                                                     | 37/41 (90.2)                                                                            | 0.842 (0.694-0.990)   |
| HER2, human epidermal growth factor receptor 2; IHC, immunohistochemistry; ISH, in situ hybridization. Percentages were calculated based on reported/non-missing data.                                                                   |                                                                             |                                                                              |                                                                                   |                                                                                         |                       |
| <sup>a</sup> Positive percent agreement is the proportion of historical HER2-negative IHC scores and local laboratory rescores in the HER2-negative subgroupings (HER2 IHC 0, 1+, 2+) that were both positive.                           |                                                                             |                                                                              |                                                                                   |                                                                                         |                       |
| <sup>b</sup> Overall percent agreement is the proportion of historical HER2-negative IHC scores and local laboratory rescores in the HER2-negative subgroupings (HER2 IHC 0, 1+, 2+) that were either in positive or negative agreement. |                                                                             |                                                                              |                                                                                   |                                                                                         |                       |

<sup>c</sup> Of the 107 patients with historical IHC 2+ whose samples were rescored in a different IHC category, 100 were rescored as IHC 1+, and 7 were rescored as IHC 0.

<sup>d</sup> Includes patients for whom information on the assay used was available.

<sup>e</sup> Non-Ventana 4B5 assays included HercepTest (Agilent), Bond Oracle HER2 IHC System (Leica), and unknown assays.

**Figure S1. Current HER2 scoring scheme.** ASCO, American Society of Clinical Oncology; CAP, College of American Pathologists; HER2, human epidermal growth factor receptor 2; IHC, immunohistochemistry; ISH, in situ hybridization. <sup>a</sup>HER2 IHC 0 with no staining was defined as no perceivable staining, and HER2 IHC 0 with staining was defined as faint or incomplete staining in <10% of cells per 2018 ASCO/CAP HER2 guidelines.<sup>1</sup>

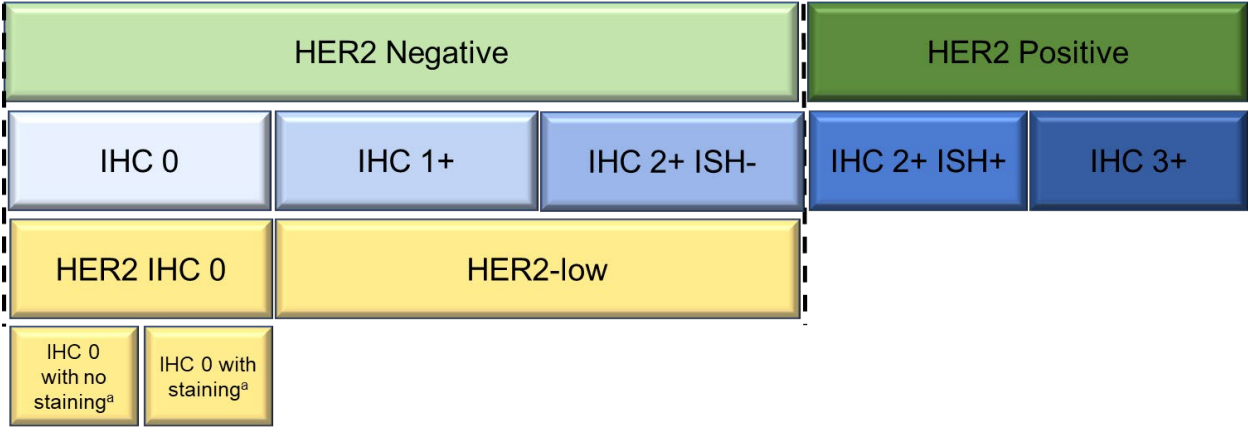

Supplement: mmc1.pdf [file mmc1.pdf]
